# Supplementary material for: A language-based sum score for the course and therapeutic intervention in primary progressive aphasia
Source: Springer Nature journal article supplement (doi:10.1186/s13195-018-0345-3), 2018-04-25
Supplement: MOESM1 [file 15718400]

Additional file 1: Table S1. Cognitive test scores and clinical rating scales within one year (visit1 and visit2) with mean (M) and standard deviation (SD) for all PPA subtypes and healthy controls (HC). P-values correspond to paired t-Tests (paired difference M2-M1), significant results (after Bonferroni correction) are indicated by asterisks.

|                                                 |         | N  | M1    | SD1  | M2    | SD2  | % Absolute Change | Paired Difference | 95% Confidence Intervall |       | p-value |
|-------------------------------------------------|---------|----|-------|------|-------|------|-------------------|-------------------|--------------------------|-------|---------|
| <b>Semantic Fluency ("Animals")<sup>a</sup></b> | PPA all | 46 | 9.65  | 5.36 | 7.00  | 5.25 | -11.05            | -2.65             | -3.68                    | -1.62 | <.001*  |
|                                                 | nfvPPA  | 20 | 10.05 | 6.49 | 7.10  | 5.89 | -12.29            | -2.95             | -4.72                    | -1.18 | .002*   |
|                                                 | svPPA   | 15 | 8.80  | 4.09 | 6.13  | 3.60 | -11.11            | -2.67             | -4.44                    | -0.89 | .006*   |
|                                                 | lvPPA   | 11 | 10.09 | 4.93 | 8.00  | 6.13 | -8.71             | -2.09             | -4.45                    | 0.26  | .076    |
|                                                 | HC      | 27 | 27.44 | 4.03 | 25.74 | 4.86 | -7.10             | -1.70             | -3.92                    | 0.51  | .127    |
| <b>Boston Naming Test<sup>a</sup></b>           | PPA all | 49 | 9.73  | 4.22 | 7.96  | 4.80 | -11.84            | -1.78             | -2.54                    | -1.01 | <.001*  |
|                                                 | nfvPPA  | 23 | 11.00 | 4.30 | 8.96  | 5.38 | -13.62            | -2.04             | -3.49                    | -0.59 | .008    |
|                                                 | svPPA   | 15 | 7.20  | 3.14 | 5.40  | 2.56 | -12.00            | -1.80             | -2.91                    | -0.69 | .004*   |
|                                                 | lvPPA   | 11 | 10.55 | 4.23 | 9.36  | 4.84 | -7.88             | -1.18             | -2.38                    | 0.01  | .052    |
|                                                 | HC      | 26 | 14.88 | 0.33 | 15.00 | 0.00 | 0.77              | 0.12              | -0.02                    | 0.25  | .083    |
| <b>MMSE<sup>a</sup></b>                         | PPA all | 47 | 23.06 | 5.70 | 19.83 | 7.57 | -10.78            | -3.23             | -4.31                    | -2.16 | <.001*  |
|                                                 | nfvPPA  | 21 | 23.19 | 6.52 | 19.24 | 8.21 | -13.17            | -3.95             | -5.63                    | -2.28 | <.001*  |
|                                                 | svPPA   | 14 | 24.57 | 4.20 | 21.50 | 6.70 | -10.24            | -3.07             | -5.03                    | -1.12 | .005*   |
|                                                 | lvPPA   | 12 | 21.08 | 5.73 | 18.92 | 7.65 | -7.22             | -2.17             | -4.65                    | 0.31  | .081    |
|                                                 | HC      | 27 | 29.00 | 0.78 | 28.78 | 1.28 | -0.74             | -0.22             | -0.83                    | 0.38  | .456    |
| <b>Wordlist Learning Total<sup>a</sup></b>      | PPA all | 44 | 13.77 | 6.26 | 10.95 | 6.64 | -9.39             | -2.82             | -3.89                    | -1.75 | <.001*  |
|                                                 | nfvPPA  | 22 | 13.64 | 6.55 | 10.27 | 7.09 | -11.21            | -3.36             | -5.11                    | -1.61 | .001*   |
|                                                 | svPPA   | 13 | 15.31 | 6.38 | 12.92 | 6.83 | -7.95             | -2.38             | -4.46                    | -0.31 | .028    |
|                                                 | lvPPA   | 9  | 11.89 | 5.40 | 9.78  | 5.09 | -7.04             | -2.11             | -4.01                    | -0.21 | .034    |
|                                                 | HC      | 26 | 23.23 | 2.73 | 23.73 | 2.47 | 1.67              | 0.50              | -0.45                    | 1.45  | .289    |

|                                                  |         |    |        |       |        |       |        |        |        |       |       |
|--------------------------------------------------|---------|----|--------|-------|--------|-------|--------|--------|--------|-------|-------|
| <b>Wordlist Savings (%)<sup>a</sup></b>          | PPA all | 39 | 71.17  | 31.74 | 66.03  | 42.96 | -5.14  | -5.14  | -18.85 | 8.57  | .452  |
|                                                  | nfvPPA  | 19 | 77.05  | 27.27 | 74.47  | 45.76 | -2.57  | -2.57  | -26.99 | 21.84 | .827  |
|                                                  | svPPA   | 12 | 65.63  | 33.24 | 60.42  | 35.73 | -5.21  | -5.21  | -24.35 | 13.94 | .561  |
|                                                  | lvPPA   | 8  | 65.52  | 40.47 | 54.38  | 47.77 | -11.15 | -11.15 | -44.84 | 22.55 | .460  |
|                                                  | HC      | 26 | 87.79  | 22.41 | 89.21  | 14.80 | 1.42   | 1.42   | -6.16  | 9.00  | .702  |
| <b>Wordlist Discriminability (%)<sup>a</sup></b> | PPA all | 43 | 88.60  | 13.38 | 83.95  | 19.57 | -4.65  | -4.65  | -9.77  | 0.47  | .074  |
|                                                  | nfvPPA  | 21 | 88.33  | 15.36 | 88.10  | 14.62 | -0.24  | -0.24  | -4.98  | 4.51  | .918  |
|                                                  | svPPA   | 13 | 86.15  | 13.25 | 73.46  | 27.11 | -12.69 | -12.69 | -27.73 | 2.35  | .091  |
|                                                  | lvPPA   | 9  | 92.78  | 7.55  | 89.44  | 10.74 | -3.33  | -3.33  | -10.78 | 4.11  | .332  |
|                                                  | HC      | 26 | 98.65  | 3.62  | 99.42  | 1.63  | 0.77   | 0.77   | -0.91  | 2.45  | .356  |
| <b>Figure Drawing<sup>a</sup></b>                | PPA all | 50 | 9.50   | 1.64  | 9.10   | 2.53  | -3.64  | -0.40  | -0.89  | 0.09  | .108  |
|                                                  | nfvPPA  | 24 | 9.58   | 1.35  | 8.79   | 2.52  | -7.20  | -0.79  | -1.63  | 0.04  | .062  |
|                                                  | svPPA   | 15 | 9.60   | 1.96  | 9.47   | 2.90  | -1.21  | -0.13  | -0.99  | 0.73  | .744  |
|                                                  | lvPPA   | 11 | 9.18   | 1.89  | 9.27   | 2.15  | 0.83   | 0.09   | -0.73  | 0.91  | .810  |
|                                                  | HC      | 26 | 10.88  | 0.33  | 10.85  | 0.37  | -0.35  | -0.04  | -0.25  | 0.17  | .713  |
| <b>Figure Savings (%)<sup>a</sup></b>            | PPA all | 47 | 66.08  | 24.36 | 55.51  | 31.48 | -10.57 | -10.57 | -19.25 | -1.90 | .018  |
|                                                  | nfvPPA  | 23 | 63.09  | 24.20 | 58.32  | 34.72 | -4.78  | -4.78  | -18.27 | 8.72  | .471  |
|                                                  | svPPA   | 14 | 69.86  | 25.58 | 54.92  | 29.02 | -14.93 | -14.93 | -29.92 | 0.05  | .051  |
|                                                  | lvPPA   | 10 | 67.68  | 24.68 | 49.88  | 29.06 | -17.80 | -17.80 | -39.66 | 4.06  | .099  |
|                                                  | HC      | 26 | 90.84  | 13.90 | 93.32  | 11.50 | 2.48   | 2.48   | -4.68  | 9.65  | .482  |
| <b>TMT-A (sec.)<sup>a</sup></b>                  | PPA all | 44 | 75.07  | 36.46 | 89.39  | 46.99 | 7.95   | 14.32  | 5.62   | 23.02 | .002* |
|                                                  | nfvPPA  | 21 | 84.19  | 33.86 | 105.14 | 49.71 | 11.64  | 20.95  | 6.63   | 35.28 | .006  |
|                                                  | svPPA   | 13 | 57.69  | 26.26 | 65.54  | 31.22 | 4.36   | 7.85   | -8.76  | 24.45 | .323  |
|                                                  | lvPPA   | 10 | 78.50  | 47.33 | 87.30  | 48.53 | 4.89   | 8.80   | -7.30  | 24.90 | .248  |
|                                                  | HC      | 26 | 37.62  | 12.13 | 35.31  | 11.82 | -1.28  | -2.31  | -6.06  | 1.44  | .217  |
| <b>TMT-B (sec.)<sup>a</sup></b>                  | PPA all | 33 | 183.21 | 79.79 | 203.00 | 90.78 | 6.60   | 19.79  | -2.70  | 42.28 | .083  |

|                                                 |         |    |        |       |        |       |        |       |        |       |        |
|-------------------------------------------------|---------|----|--------|-------|--------|-------|--------|-------|--------|-------|--------|
|                                                 | nfvPPA  | 16 | 228.19 | 74.18 | 240.81 | 92.34 | 4.21   | 12.63 | -24.70 | 49.95 | .482   |
|                                                 | svPPA   | 11 | 134.91 | 71.56 | 154.36 | 83.31 | 6.48   | 19.45 | -21.50 | 60.41 | .315   |
|                                                 | lvPPA   | 6  | 151.83 | 34.75 | 191.33 | 57.77 | 13.17  | 39.50 | -17.64 | 96.64 | .136   |
|                                                 | HC      | 26 | 74.92  | 23.53 | 74.15  | 23.65 | -0.26  | -0.77 | -9.71  | 8.17  | .861   |
| <b>Phonemic Fluency ("S-words")<sup>a</sup></b> | PPA all | 41 | 6.68   | 4.15  | 4.68   | 4.11  | -16.67 | -2.00 | -2.99  | -1.01 | <.001* |
|                                                 | nfvPPA  | 19 | 5.00   | 4.28  | 3.42   | 4.29  | -13.16 | -1.58 | -2.71  | -0.45 | .009   |
|                                                 | svPPA   | 13 | 7.62   | 4.11  | 5.00   | 3.42  | -21.79 | -2.62 | -4.60  | -0.63 | .014   |
|                                                 | lvPPA   | 9  | 8.89   | 2.47  | 6.89   | 3.79  | -16.67 | -2.00 | -5.44  | 1.44  | .217   |
|                                                 | HC      | 27 | 18.59  | 4.13  | 16.81  | 5.62  | -14.81 | -1.78 | -3.39  | -0.16 | .032   |
| <b>Digit Span Forward</b>                       | PPA all | 43 | 4.19   | 2.20  | 3.51   | 2.71  | -11.24 | -0.67 | -1.12  | -0.23 | .004*  |
|                                                 | nfvPPA  | 20 | 3.80   | 1.99  | 2.60   | 1.82  | -20.00 | -1.20 | -1.69  | -0.71 | <.001* |
|                                                 | svPPA   | 12 | 5.50   | 1.93  | 5.50   | 2.61  | 0.00   | 0.00  | -1.18  | 1.18  | 1.000  |
|                                                 | lvPPA   | 11 | 3.45   | 2.38  | 3.00   | 3.22  | -7.58  | -0.45 | -1.37  | 0.46  | .296   |
|                                                 | HC      | 18 | 8.72   | 1.74  | 8.17   | 1.82  | -9.26  | -0.56 | -1.43  | 0.32  | .197   |
| <b>Digit Span Backward</b>                      | PPA all | 41 | 3.73   | 2.04  | 3.02   | 2.23  | -11.79 | -0.71 | -1.12  | -0.29 | .001*  |
|                                                 | nfvPPA  | 19 | 3.05   | 1.72  | 2.26   | 1.88  | -13.16 | -0.79 | -1.52  | -0.06 | .035   |
|                                                 | svPPA   | 11 | 5.18   | 1.89  | 4.73   | 2.41  | -7.58  | -0.45 | -1.21  | 0.30  | .211   |
|                                                 | lvPPA   | 11 | 3.45   | 2.11  | 2.64   | 1.80  | -13.64 | -0.82 | -1.60  | -0.03 | .042   |
|                                                 | HC      | 18 | 6.44   | 1.34  | 6.56   | 1.85  | 1.85   | 0.11  | -0.88  | 1.10  | .816   |
| <b>Block Tapping Forward</b>                    | PPA all | 40 | 6.23   | 1.86  | 5.58   | 2.41  | -4.64  | -0.65 | -1.34  | 0.04  | .065   |
|                                                 | nfvPPA  | 22 | 5.95   | 2.06  | 5.18   | 2.70  | -5.52  | -0.77 | -1.90  | 0.36  | .169   |
|                                                 | svPPA   | 10 | 7.10   | 1.45  | 6.60   | 2.12  | -3.57  | -0.50 | -1.90  | 0.90  | .440   |
|                                                 | lvPPA   | 8  | 5.88   | 1.55  | 5.38   | 1.60  | -3.57  | -0.50 | -1.59  | 0.59  | .316   |
|                                                 | HC      | 17 | 7.94   | 1.60  | 8.29   | 1.57  | 2.52   | 0.35  | -0.48  | 1.18  | .382   |
| <b>Block Tapping Backward</b>                   | PPA all | 38 | 5.34   | 2.02  | 4.84   | 2.81  | -4.17  | -0.50 | -1.17  | 0.17  | .136   |
|                                                 | nfvPPA  | 20 | 4.65   | 2.11  | 4.60   | 2.82  | -0.42  | -0.05 | -1.04  | 0.94  | .917   |

|                                                  |         |    |       |       |       |       |        |        |        |       |        |
|--------------------------------------------------|---------|----|-------|-------|-------|-------|--------|--------|--------|-------|--------|
|                                                  | svPPA   | 10 | 6.50  | 1.84  | 5.30  | 3.40  | -10.00 | -1.20  | -2.77  | 0.37  | .119   |
|                                                  | lvPPA   | 8  | 5.63  | 1.30  | 4.88  | 2.17  | -6.25  | -0.75  | -1.91  | 0.41  | .170   |
|                                                  | HC      | 17 | 7.47  | 2.15  | 7.06  | 1.48  | -3.43  | -0.41  | -1.53  | 0.71  | .448   |
| <b>Token Test Errors (age-corrected)</b>         | PPA all | 39 | 5.69  | 8.02  | 11.21 | 12.84 | 11.03  | 5.51   | 2.91   | 8.11  | <.001* |
|                                                  | nvPPA   | 21 | 6.76  | 8.14  | 13.24 | 13.72 | 12.95  | 6.48   | 2.27   | 10.68 | .004*  |
|                                                  | svPPA   | 9  | 6.44  | 10.21 | 10.11 | 13.74 | 6.60   | 3.30   | -0.66  | 7.26  | .092   |
|                                                  | lvPPA   | 8  | 2.75  | 4.74  | 8.50  | 10.09 | 11.50  | 5.75   | -0.47  | 11.97 | .065   |
|                                                  | HC      | 17 | 0.00  | 0.00  | 0.00  | 0.00  |        | 0.00   |        |       | b      |
| <b>Written Language (Aachener Aphasia Test)</b>  | PPA all | 40 | 79.95 | 13.45 | 67.60 | 24.17 | -13.72 | -12.35 | -17.83 | -6.87 | <.001* |
|                                                  | nvPPA   | 19 | 76.74 | 16.60 | 60.21 | 26.16 | -18.36 | -16.53 | -24.96 | -8.10 | .001*  |
|                                                  | svPPA   | 11 | 81.55 | 10.83 | 70.27 | 26.51 | -11.39 | -10.25 | -22.98 | 2.48  | .104   |
|                                                  | lvPPA   | 9  | 83.89 | 7.87  | 77.56 | 10.98 | -7.04  | -6.33  | -14.00 | 1.33  | .093   |
|                                                  | HC      | 17 | 89.88 | 0.49  | 89.65 | 0.61  | -0.26  | -0.24  | -0.46  | -0.01 | .041   |
| <b>Correct Repeat of Repeat &amp; Point Test</b> | PPA all | 44 | 8.20  | 2.15  | 6.89  | 3.06  | -13.18 | -1.32  | -1.88  | -0.76 | <.001* |
|                                                  | nvPPA   | 23 | 7.35  | 2.27  | 5.83  | 3.28  | -15.22 | -1.52  | -2.45  | -0.59 | .003*  |
|                                                  | svPPA   | 11 | 9.45  | 1.51  | 8.64  | 2.38  | -7.50  | -0.75  | -1.47  | -0.03 | .043   |
|                                                  | lvPPA   | 9  | 8.67  | 1.73  | 7.11  | 2.20  | -15.56 | -1.56  | -2.95  | -0.16 | .033   |
|                                                  | HC      | 16 | 10.00 | 0.00  | 10.00 | 0.00  | 0.00   |        |        |       | b      |
| <b>Correct Point of Repeat &amp; Point Test</b>  | PPA all | 44 | 8.23  | 1.94  | 7.80  | 2.20  | -4.32  | -0.43  | -1.05  | 0.19  | .167   |
|                                                  | nvPPA   | 23 | 9.04  | 1.40  | 7.91  | 2.19  | -11.30 | -1.13  | -1.97  | -0.29 | .010   |
|                                                  | svPPA   | 11 | 6.45  | 1.86  | 6.91  | 2.34  | 2.50   | 0.25   | -1.21  | 1.71  | .714   |
|                                                  | lvPPA   | 9  | 8.33  | 2.06  | 8.78  | 1.79  | 4.44   | 0.44   | -0.58  | 1.47  | .347   |
|                                                  | HC      | 16 | 10.00 | 0.00  | 10.00 | 0.00  | 0.00   |        |        |       | b      |
| <b>Cookie Theft Picture Test</b>                 | PPA all | 27 | 9.45  | 3.40  | 6.76  | 4.11  | -13.48 | -2.70  | -3.72  | -1.67 | <.001* |
|                                                  | nvPPA   | 16 | 9.50  | 2.90  | 5.06  | 3.21  | -22.19 | -4.44  | -6.02  | -2.86 | <.001* |
|                                                  | svPPA   | 8  | 9.00  | 3.67  | 7.63  | 4.03  | -6.11  | -1.22  | -2.65  | 0.20  | .084   |

|                                                                |         |    |       |       |       |       |              |        |        |       |        |
|----------------------------------------------------------------|---------|----|-------|-------|-------|-------|--------------|--------|--------|-------|--------|
|                                                                | lvPPA   | 8  | 10.00 | 4.54  | 9.13  | 4.97  | -4.38        | -0.88  | -2.09  | 0.34  | .133   |
|                                                                | HC      | 8  | 14.88 | 2.95  | 15.38 | 3.16  | 2.50         | 0.50   | -2.81  | 3.81  | .732   |
| <b>Stroop Test: Correct answers of interference condition</b>  | PPA all | 26 | 22.54 | 13.42 | 18.15 | 13.68 | <sup>c</sup> | -4.38  | -8.71  | -0.06 | .047   |
|                                                                | nfvPPA  | 11 | 19.64 | 15.21 | 12.64 | 11.24 | <sup>c</sup> | -7.00  | -16.20 | 2.20  | .121   |
|                                                                | svPPA   | 10 | 29.40 | 12.00 | 26.10 | 15.95 | <sup>c</sup> | -3.30  | -10.15 | 3.55  | .304   |
|                                                                | lvPPA   | 5  | 15.20 | 3.70  | 14.40 | 4.72  | <sup>c</sup> | -0.80  | -3.02  | 1.42  | .374   |
|                                                                | HC      | 18 | 46.83 | 9.93  | 45.61 | 10.87 | <sup>c</sup> | -1.22  | -3.50  | 1.05  | .272   |
| <b>Stroop Test: Number of errors in interference condition</b> | PPA all | 26 | 1.31  | 2.40  | 1.23  | 2.82  | <sup>c</sup> | -0.08  | -1.57  | 1.42  | .917   |
|                                                                | nfvPPA  | 11 | 1.27  | 2.65  | 2.09  | 4.16  | <sup>c</sup> | 0.82   | -2.67  | 4.31  | .613   |
|                                                                | svPPA   | 10 | 1.70  | 2.71  | 0.30  | 0.68  | <sup>c</sup> | -1.40  | -2.95  | 0.15  | .072   |
|                                                                | lvPPA   | 5  | 0.60  | 0.89  | 1.20  | 1.10  | <sup>c</sup> | 0.60   | -0.51  | 1.71  | .208   |
|                                                                | HC      | 18 | 0.50  | 0.99  | 0.39  | 0.61  | <sup>c</sup> | -0.11  | -0.56  | 0.34  | .607   |
| <b>Hamasch 5Point Test: Percent of Correct Figures</b>         | PPA all | 35 | 80.71 | 16.60 | 73.23 | 25.81 | -7.49        | -7.49  | -14.75 | -0.23 | .044   |
|                                                                | nfvPPA  | 15 | 76.13 | 15.90 | 59.07 | 30.68 | -17.07       | -17.07 | -30.61 | -3.52 | .017   |
|                                                                | svPPA   | 11 | 81.36 | 18.47 | 85.55 | 13.74 | 4.18         | 4.18   | -4.98  | 13.34 | .333   |
|                                                                | lvPPA   | 9  | 87.56 | 14.47 | 81.78 | 16.76 | -5.78        | -5.78  | -18.08 | 6.53  | .310   |
|                                                                | HC      | 19 | 92.84 | 5.38  | 92.95 | 7.96  | 0.11         | 0.11   | -4.42  | 4.63  | .962   |
| <b>Cognitive Estimation Test</b>                               | PPA all | 32 | 9.72  | 3.03  | 8.66  | 3.79  | -6.64        | -1.06  | -2.06  | -0.06 | .038   |
|                                                                | nfvPPA  | 14 | 10.36 | 2.90  | 9.07  | 3.52  | -8.04        | -1.29  | -2.81  | 0.24  | .092   |
|                                                                | svPPA   | 10 | 8.60  | 3.06  | 8.00  | 4.50  | -3.75        | -0.60  | -2.74  | 1.54  | .541   |
|                                                                | lvPPA   | 8  | 10.00 | 3.21  | 8.75  | 3.69  | -7.81        | -1.25  | -3.77  | 1.27  | .279   |
|                                                                | HC      | 18 | 12.17 | 2.33  | 12.33 | 1.71  | 1.04         | 0.17   | -1.09  | 1.42  | .783   |
| <b>CDR</b>                                                     | PPA all | 35 | 3.09  | 3.12  | 4.76  | 4.27  | 9.29         | 1.67   | 0.80   | 2.55  | <.001* |
|                                                                | nfvPPA  | 15 | 2.50  | 3.27  | 3.77  | 3.41  | 7.04         | 1.27   | 0.36   | 2.18  | .010*  |
|                                                                | svPPA   | 11 | 3.86  | 3.04  | 6.27  | 5.29  | 13.38        | 2.41   | 0.50   | 4.32  | .019*  |
|                                                                | lvPPA   | 9  | 3.11  | 3.08  | 4.56  | 4.14  | 8.02         | 1.44   | -1.17  | 4.05  | .238   |

|                 |         |    |      |      |      |      |       |       |       |      |        |
|-----------------|---------|----|------|------|------|------|-------|-------|-------|------|--------|
|                 | HC      | 20 | 0.05 | 0.15 | 0.03 | 0.11 | -0.14 | -0.03 | -0.12 | 0.07 | .577   |
| <b>FTLD-CDR</b> | PPA all | 35 | 5.29 | 3.88 | 7.63 | 5.27 | 9.76  | 2.34  | 1.37  | 3.31 | <.001* |
|                 | nfvPPA  | 15 | 4.73 | 4.13 | 6.67 | 4.25 | 8.06  | 1.93  | 0.91  | 2.95 | .001*  |
|                 | svPPA   | 11 | 6.27 | 3.80 | 9.36 | 6.82 | 12.88 | 3.09  | 0.83  | 5.35 | .012*  |
|                 | lvPPA   | 9  | 5.00 | 3.72 | 7.11 | 4.71 | 8.80  | 2.11  | -0.63 | 4.85 | .113   |
|                 | HC      | 20 | 0.05 | 0.15 | 0.03 | 0.11 | -0.10 | -0.03 | -0.12 | 0.07 | .577   |

<sup>a</sup>Assessments are included in the CERAD-plus battery.

<sup>b</sup>Test statistics are not available due to a paired difference value of 0.

<sup>c</sup> Absent absolute percent change due to a lacking maximum attainable score.
