# Supplementary material for: A language-based sum score for the course and therapeutic intervention in primary progressive aphasia
Source: Springer Nature journal article supplement (doi:10.1186/s13195-018-0345-3), 2018-04-25
Supplement: MOESM2 [file 15718400]

Additional file 2: Table S2. Volumetric results (measured in ml) within one year (visit1 and visit2) with mean (M) and standard deviation (SD) for all PPA subtypes and healthy controls (HC). P-values correspond to paired t-Tests (paired difference M2-M1), significant results (after Bonferroni correction) are indicated by asterisks. nfvPPA (N=17), svPPA (N=7), lvPPA (N=10), HC (N=11)

|                           |         | <b>M1</b> | <b>SD 1</b> | <b>M 2</b> | <b>SD 2</b> | <b>% Relative Change</b> | <b>Paired Difference</b> | <b>95% Confidence Intervall</b> |        | <b>p-value</b> |
|---------------------------|---------|-----------|-------------|------------|-------------|--------------------------|--------------------------|---------------------------------|--------|----------------|
| <b>Whole Brain Volume</b> | PPA all | 962.42    | 101.56      | 936.86     | 103.78      | -2.66                    | -25.56                   | -32.34                          | -18.78 | <.001*         |
|                           | nfvPPA  | 945.26    | 106.98      | 920.08     | 108.82      | -2.66                    | -25.19                   | -37.31                          | -13.07 | <.001*         |
|                           | svPPA   | 974.00    | 104.83      | 947.47     | 101.08      | -2.72                    | -26.53                   | -38.86                          | -14.20 | .002           |
|                           | lvPPA   | 983.46    | 94.85       | 957.95     | 102.54      | -2.59                    | -25.51                   | -37.42                          | -13.60 | <.001*         |
|                           | HC      | 1039.45   | 97.99       | 1031.96    | 101.21      | -0.73                    | -7.49                    | -15.61                          | 0.63   | .067           |
| <b>Frontallobe L</b>      | PPA all | 131.05    | 17.87       | 125.79     | 19.65       | -4.01                    | -5.26                    | -6.97                           | -3.55  | <.001*         |
|                           | nfvPPA  | 123.42    | 19.02       | 117.19     | 20.25       | -5.04                    | -6.23                    | -9.20                           | -3.25  | <.001*         |
|                           | svPPA   | 143.06    | 14.61       | 138.48     | 15.35       | -3.20                    | -4.58                    | -7.79                           | -1.38  | .013           |
|                           | lvPPA   | 135.62    | 11.84       | 131.53     | 15.10       | -3.02                    | -4.09                    | -7.05                           | -1.13  | .012           |
|                           | HC      | 147.78    | 16.63       | 146.22     | 16.84       | -1.06                    | -1.55                    | -4.52                           | 1.41   | .270           |
| <b>Frontallobe R</b>      | PPA all | 133.90    | 16.77       | 129.28     | 18.13       | -3.45                    | -4.62                    | -6.18                           | -3.07  | <.001*         |
|                           | nfvPPA  | 128.50    | 17.22       | 123.50     | 17.48       | -3.90                    | -5.01                    | -7.63                           | -2.38  | .001*          |
|                           | svPPA   | 142.04    | 15.47       | 137.43     | 17.03       | -3.24                    | -4.60                    | -7.56                           | -1.65  | .009           |
|                           | lvPPA   | 137.40    | 14.99       | 133.42     | 18.28       | -2.90                    | -3.98                    | -7.09                           | -0.87  | .018           |
|                           | HC      | 147.27    | 17.03       | 145.34     | 16.92       | -1.31                    | -1.94                    | -4.72                           | 0.85   | .153           |
| <b>Temporal lobe L</b>    | PPA all | 75.18     | 10.43       | 72.26      | 11.37       | -3.88                    | -2.92                    | -3.85                           | -1.98  | <.001*         |
|                           | nfvPPA  | 77.79     | 9.46        | 75.00      | 10.95       | -3.60                    | -2.80                    | -4.48                           | -1.12  | .003           |
|                           | svPPA   | 64.39     | 6.75        | 60.48      | 6.11        | -6.08                    | -3.91                    | -5.59                           | -2.23  | .001*          |
|                           | lvPPA   | 78.29     | 9.77        | 75.87      | 9.96        | -3.10                    | -2.42                    | -3.88                           | -0.97  | .004           |
|                           | HC      | 88.28     | 8.12        | 87.52      | 8.54        | -0.86                    | -0.76                    | -1.83                           | 0.31   | .143           |

|                                 |         |       |       |       |       |       |       |       |       |        |
|---------------------------------|---------|-------|-------|-------|-------|-------|-------|-------|-------|--------|
| <b>Temporal lobe R</b>          | PPA all | 79.01 | 13.97 | 77.07 | 13.88 | -2.45 | -1.94 | -2.74 | -1.14 | <.001* |
|                                 | nfvPPA  | 82.06 | 10.57 | 80.91 | 10.25 | -1.40 | -1.15 | -2.23 | -0.07 | .038   |
|                                 | svPPA   | 65.23 | 17.48 | 61.45 | 15.73 | -5.78 | -3.77 | -5.47 | -2.07 | .002   |
|                                 | lvPPA   | 83.47 | 11.21 | 81.49 | 10.75 | -2.38 | -1.99 | -3.65 | -0.32 | .025   |
|                                 | HC      | 89.57 | 7.86  | 88.83 | 8.24  | -0.83 | -0.75 | -2.07 | 0.58  | .238   |
| <b>Inferior frontal gyrus L</b> | PPA all | 9.63  | 1.78  | 9.29  | 1.81  | -3.55 | -0.34 | -0.48 | -0.21 | <.001* |
|                                 | nfvPPA  | 8.97  | 1.75  | 8.60  | 1.77  | -4.15 | -0.37 | -0.59 | -0.15 | .002   |
|                                 | svPPA   | 10.67 | 1.61  | 10.25 | 1.71  | -3.85 | -0.41 | -0.66 | -0.16 | .006   |
|                                 | lvPPA   | 10.03 | 1.62  | 9.79  | 1.60  | -2.43 | -0.24 | -0.55 | 0.06  | .102   |
|                                 | HC      | 11.67 | 1.39  | 11.60 | 1.30  | -0.60 | -0.07 | -0.26 | 0.12  | .414   |
| <b>Inferior frontal gyrus R</b> | PPA all | 10.64 | 1.82  | 10.27 | 1.83  | -3.41 | -0.36 | -0.51 | -0.22 | <.001* |
|                                 | nfvPPA  | 10.23 | 1.46  | 9.84  | 1.43  | -3.75 | -0.38 | -0.62 | -0.14 | .004   |
|                                 | svPPA   | 11.21 | 2.26  | 10.75 | 2.31  | -4.11 | -0.46 | -0.71 | -0.21 | .004   |
|                                 | lvPPA   | 10.93 | 2.05  | 10.67 | 2.11  | -2.39 | -0.26 | -0.55 | 0.03  | .070   |
|                                 | HC      | 12.38 | 1.33  | 12.31 | 1.33  | -0.57 | -0.07 | -0.28 | 0.14  | .459   |
| <b>Middle frontal gyrus L</b>   | PPA all | 18.19 | 3.23  | 17.44 | 3.46  | -4.14 | -0.75 | -1.03 | -0.47 | <.001* |
|                                 | nfvPPA  | 17.40 | 3.26  | 16.57 | 3.38  | -4.77 | -0.83 | -1.30 | -0.36 | .002   |
|                                 | svPPA   | 20.30 | 3.86  | 19.52 | 4.07  | -3.84 | -0.78 | -1.40 | -0.16 | .022   |
|                                 | lvPPA   | 18.06 | 2.22  | 17.46 | 2.75  | -3.34 | -0.60 | -1.13 | -0.08 | .029   |
|                                 | HC      | 21.31 | 2.31  | 21.10 | 2.42  | -0.99 | -0.21 | -0.96 | 0.54  | .547   |
| <b>Middle frontal gyrus R</b>   | PPA all | 18.78 | 2.91  | 17.99 | 3.19  | -4.20 | -0.79 | -1.10 | -0.48 | <.001* |
|                                 | nfvPPA  | 18.34 | 3.03  | 17.57 | 3.16  | -4.20 | -0.77 | -1.27 | -0.28 | .004   |
|                                 | svPPA   | 20.11 | 3.50  | 19.14 | 3.84  | -4.84 | -0.97 | -1.67 | -0.27 | .015   |
|                                 | lvPPA   | 18.58 | 2.17  | 17.89 | 2.87  | -3.70 | -0.69 | -1.36 | -0.02 | .045   |
|                                 | HC      | 21.36 | 2.50  | 21.09 | 2.56  | -1.26 | -0.26 | -0.91 | 0.38  | .382   |
| <b>Superior frontal gyrus L</b> | PPA all | 23.99 | 3.42  | 23.02 | 3.69  | -4.04 | -0.97 | -1.29 | -0.65 | <.001* |

|                                  |         |       |      |       |      |       |       |       |       |        |
|----------------------------------|---------|-------|------|-------|------|-------|-------|-------|-------|--------|
|                                  | nfvPPA  | 23.11 | 3.82 | 22.02 | 3.94 | -4.70 | -1.09 | -1.63 | -0.54 | .001*  |
|                                  | svPPA   | 25.12 | 3.60 | 24.01 | 3.67 | -4.42 | -1.11 | -1.59 | -0.63 | .001*  |
|                                  | lvPPA   | 24.69 | 2.32 | 24.02 | 3.08 | -2.71 | -0.67 | -1.30 | -0.04 | .040   |
|                                  | HC      | 27.73 | 2.59 | 27.47 | 2.91 | -0.94 | -0.25 | -1.11 | 0.60  | .520   |
| <b>Superior frontal gyrus R</b>  | PPA all | 24.76 | 3.41 | 23.76 | 3.61 | -4.07 | -1.01 | -1.31 | -0.70 | <.001* |
|                                  | nfvPPA  | 24.33 | 3.65 | 23.24 | 3.56 | -4.49 | -1.09 | -1.55 | -0.63 | <.001* |
|                                  | svPPA   | 25.06 | 4.09 | 24.01 | 4.26 | -4.17 | -1.04 | -1.72 | -0.37 | .009   |
|                                  | lvPPA   | 25.29 | 2.66 | 24.45 | 3.47 | -3.31 | -0.84 | -1.55 | -0.13 | .026   |
|                                  | HC      | 28.05 | 2.51 | 27.76 | 2.55 | -1.03 | -0.28 | -1.24 | 0.67  | .526   |
| <b>Inferior temporal gyrus L</b> | PPA all | 9.43  | 1.83 | 9.07  | 1.89 | -3.78 | -0.36 | -0.49 | -0.23 | <.001* |
|                                  | nfvPPA  | 10.10 | 1.39 | 9.78  | 1.42 | -3.17 | -0.32 | -0.52 | -0.12 | .004   |
|                                  | svPPA   | 6.85  | 0.79 | 6.40  | 0.69 | -6.67 | -0.46 | -0.75 | -0.16 | .009   |
|                                  | lvPPA   | 10.09 | 1.37 | 9.74  | 1.46 | -3.48 | -0.35 | -0.65 | -0.05 | .025   |
|                                  | HC      | 11.16 | 1.33 | 11.06 | 1.36 | -0.90 | -0.09 | -0.29 | 0.11  | 1.000  |
| <b>Inferior temporal gyrus R</b> | PPA all | 10.73 | 2.26 | 10.48 | 2.23 | -2.34 | -0.25 | -0.43 | -0.07 | .007   |
|                                  | nfvPPA  | 11.36 | 1.58 | 11.26 | 1.47 | -0.89 | -0.10 | -0.37 | 0.17  | .445   |
|                                  | svPPA   | 8.09  | 2.77 | 7.54  | 2.40 | -6.74 | -0.55 | -0.94 | -0.15 | .015   |
|                                  | lvPPA   | 11.52 | 1.49 | 11.21 | 1.45 | -2.62 | -0.30 | -0.63 | 0.03  | .069   |
|                                  | HC      | 12.36 | 1.44 | 12.25 | 1.35 | -0.89 | -0.11 | -0.35 | 0.13  | .334   |
| <b>Middle temporal gyrus L</b>   | PPA all | 11.08 | 1.83 | 10.57 | 2.05 | -4.58 | -0.51 | -0.67 | -0.34 | <.001* |
|                                  | nfvPPA  | 11.72 | 1.75 | 11.29 | 2.04 | -3.69 | -0.43 | -0.72 | -0.15 | .005   |
|                                  | svPPA   | 9.02  | 0.84 | 8.29  | 0.71 | -8.10 | -0.73 | -1.15 | -0.31 | .005   |
|                                  | lvPPA   | 11.43 | 1.48 | 10.96 | 1.56 | -4.15 | -0.48 | -0.70 | -0.25 | .001*  |
|                                  | HC      | 13.57 | 1.35 | 13.46 | 1.41 | -0.81 | -0.11 | -0.24 | 0.02  | .089   |
| <b>Middle temporal gyrus R</b>   | PPA all | 12.35 | 2.65 | 11.98 | 2.65 | -3.00 | -0.37 | -0.57 | -0.17 | .001*  |
|                                  | nfvPPA  | 13.15 | 2.08 | 12.95 | 2.04 | -1.54 | -0.20 | -0.51 | 0.11  | .185   |

|                                  |         |       |      |       |      |       |       |       |       |        |
|----------------------------------|---------|-------|------|-------|------|-------|-------|-------|-------|--------|
|                                  | svPPA   | 9.61  | 3.20 | 8.89  | 2.77 | -7.52 | -0.72 | -1.16 | -0.28 | .007   |
|                                  | lvPPA   | 12.91 | 1.95 | 12.50 | 1.92 | -3.18 | -0.41 | -0.75 | -0.07 | .024   |
|                                  | HC      | 14.39 | 1.48 | 14.25 | 1.60 | -0.97 | -0.15 | -0.49 | 0.20  | .369   |
| <b>Superior temporal gyrus L</b> | PPA all | 14.47 | 2.53 | 13.85 | 2.69 | -4.30 | -0.62 | -0.81 | -0.44 | <.001* |
|                                  | nfvPPA  | 15.13 | 2.42 | 14.45 | 2.72 | -4.49 | -0.68 | -1.01 | -0.35 | <.001* |
|                                  | svPPA   | 12.24 | 1.45 | 11.52 | 1.18 | -5.88 | -0.72 | -1.16 | -0.27 | .008   |
|                                  | lvPPA   | 14.92 | 2.58 | 14.47 | 2.66 | -3.06 | -0.46 | -0.71 | -0.21 | .002   |
|                                  | HC      | 17.89 | 1.65 | 17.82 | 1.64 | -0.39 | -0.07 | -0.24 | 0.09  | .349   |
| <b>Superior temporal gyrus R</b> | PPA all | 13.78 | 3.01 | 13.35 | 2.97 | -3.11 | -0.43 | -0.60 | -0.26 | <.001* |
|                                  | nfvPPA  | 14.43 | 2.22 | 14.11 | 2.22 | -2.20 | -0.32 | -0.57 | -0.07 | .016   |
|                                  | svPPA   | 10.87 | 3.88 | 10.18 | 3.42 | -6.31 | -0.69 | -1.19 | -0.18 | .016   |
|                                  | lvPPA   | 14.71 | 2.48 | 14.27 | 2.44 | -2.96 | -0.44 | -0.75 | -0.12 | .012   |
|                                  | HC      | 16.13 | 1.24 | 15.99 | 1.17 | -0.87 | -0.14 | -0.34 | 0.66  | .164   |
| <b>Fusiform gyrus L</b>          | PPA all | 7.00  | 1.08 | 6.73  | 1.13 | -3.79 | -0.27 | -0.37 | -0.16 | <.001* |
|                                  | nfvPPA  | 7.28  | 0.96 | 7.07  | 0.96 | -2.90 | -0.21 | -0.37 | -0.05 | .013   |
|                                  | svPPA   | 6.10  | 0.98 | 5.68  | 0.91 | -6.90 | -0.42 | -0.66 | -0.18 | .005   |
|                                  | lvPPA   | 7.15  | 1.11 | 6.90  | 1.18 | -3.50 | -0.25 | -0.44 | -0.06 | .015   |
|                                  | HC      | 7.80  | 0.79 | 7.74  | 0.72 | -0.77 | -0.06 | -0.24 | 0.11  | .439   |
| <b>Fusiform gyrus R</b>          | PPA all | 7.18  | 1.44 | 7.02  | 1.42 | -2.31 | -0.17 | -0.27 | -0.06 | .002   |
|                                  | nfvPPA  | 7.39  | 1.35 | 7.31  | 1.30 | -1.10 | -0.08 | -0.23 | 0.07  | .278   |
|                                  | svPPA   | 6.13  | 1.65 | 5.80  | 1.52 | -5.40 | -0.33 | -0.55 | -0.12 | .009   |
|                                  | lvPPA   | 7.56  | 1.20 | 7.36  | 1.19 | -2.59 | -0.20 | -0.41 | 0.01  | .064   |
|                                  | HC      | 7.93  | 0.62 | 7.88  | 0.62 | -0.63 | -0.05 | -0.20 | 0.11  | .526   |
| <b>Parahippocampal gyrus L</b>   | PPA all | 3.82  | 0.43 | 3.71  | 0.46 | -3.06 | -0.12 | -0.18 | -0.05 | .001*  |
|                                  | nfvPPA  | 3.95  | 0.34 | 3.86  | 0.35 | -2.10 | -0.08 | -0.18 | 0.01  | .090   |
|                                  | svPPA   | 3.39  | 0.34 | 3.18  | 0.30 | -6.08 | -0.21 | -0.31 | -0.10 | .003   |

|                                |         |      |      |      |      |       |       |       |       |        |
|--------------------------------|---------|------|------|------|------|-------|-------|-------|-------|--------|
|                                | lvPPA   | 3.92 | 0.47 | 3.81 | 0.48 | -2.86 | -0.11 | -0.25 | 0.03  | .099   |
|                                | HC      | 4.09 | 0.24 | 4.07 | 0.20 | -0.49 | -0.02 | -0.10 | 0.06  | .617   |
| <b>Parahippocampal gyrus R</b> | PPA all | 4.36 | 0.59 | 4.27 | 0.61 | -2.09 | -0.09 | -0.15 | -0.03 | .006   |
|                                | nfvPPA  | 4.49 | 0.40 | 4.44 | 0.33 | -1.29 | -0.06 | -0.15 | 0.04  | .229   |
|                                | svPPA   | 3.79 | 0.74 | 3.59 | 0.73 | -5.30 | -0.20 | -0.30 | -0.10 | .002   |
|                                | lvPPA   | 4.53 | 0.58 | 4.46 | 0.59 | -1.55 | -0.07 | -0.21 | 0.07  | .274   |
|                                | HC      | 4.60 | 0.42 | 4.56 | 0.38 | -0.87 | -0.04 | -0.13 | 0.06  | .420   |
| <b>Hippocampus L</b>           | PPA all | 2.54 | 0.31 | 2.42 | 0.34 | -4.99 | -0.13 | -0.17 | -0.09 | <.001* |
|                                | nfvPPA  | 2.64 | 0.30 | 2.53 | 0.33 | -4.12 | -0.11 | -0.17 | -0.04 | .002   |
|                                | svPPA   | 2.21 | 0.31 | 2.01 | 0.23 | -9.04 | -0.20 | -0.28 | -0.12 | .001*  |
|                                | lvPPA   | 2.61 | 0.18 | 2.50 | 0.20 | -4.11 | -0.11 | -0.19 | -0.03 | .015   |
|                                | HC      | 2.96 | 0.18 | 2.91 | 0.20 | -1.69 | -0.05 | -0.10 | 0.01  | .096   |
| <b>Hippocampus R</b>           | PPA all | 2.75 | 0.41 | 2.65 | 0.43 | -3.35 | -0.09 | -0.13 | -0.06 | <.001* |
|                                | nfvPPA  | 2.86 | 0.29 | 2.82 | 0.26 | -1.54 | -0.04 | -0.09 | 0.00  | .048   |
|                                | svPPA   | 2.29 | 0.60 | 2.15 | 0.59 | -6.29 | -0.14 | -0.22 | -0.07 | .004   |
|                                | lvPPA   | 2.87 | 0.16 | 2.73 | 0.21 | -4.75 | -0.14 | -0.21 | -0.06 | .003   |
|                                | HC      | 3.06 | 0.18 | 3.03 | 0.22 | -0.98 | -0.03 | -0.08 | 0.03  | .277   |
| <b>Amygdala L</b>              | PPA all | 1.31 | 0.21 | 1.26 | 0.24 | -4.11 | -0.05 | -0.08 | -0.03 | <.001* |
|                                | nfvPPA  | 1.38 | 0.15 | 1.33 | 0.17 | -3.20 | -0.04 | -0.08 | -0.01 | .013   |
|                                | svPPA   | 1.00 | 0.14 | 0.92 | 0.14 | -8.37 | -0.08 | -0.10 | -0.06 | <.001* |
|                                | lvPPA   | 1.43 | 0.14 | 1.38 | 0.18 | -3.30 | -0.05 | -0.10 | 0.01  | .080   |
|                                | HC      | 1.56 | 0.10 | 1.56 | 0.92 | 0.00  | 0.01  | -0.03 | 0.05  | .588   |
| <b>Amygdala R</b>              | PPA all | 1.53 | 0.27 | 1.48 | 0.27 | -3.47 | -0.05 | -0.07 | -0.03 | <.001* |
|                                | nfvPPA  | 1.60 | 0.16 | 1.57 | 0.16 | -2.06 | -0.03 | -0.06 | -0.01 | .004   |
|                                | svPPA   | 1.21 | 0.35 | 1.10 | 0.31 | -8.95 | -0.11 | -0.16 | -0.05 | .003   |
|                                | lvPPA   | 1.63 | 0.18 | 1.58 | 0.14 | -2.83 | -0.05 | -0.09 | -0.01 | .026   |

|                        |         |       |      |       |      |       |       |       |       |        |
|------------------------|---------|-------|------|-------|------|-------|-------|-------|-------|--------|
|                        | HC      | 1.79  | 0.10 | 1.77  | 0.10 | -1.12 | -0.02 | -0.05 | 0.01  | .167   |
| <b>Insula L</b>        | PPA all | 6.92  | 0.99 | 6.68  | 1.02 | -3.50 | -0.24 | -0.33 | -0.15 | <.001* |
|                        | nfvPPA  | 6.89  | 1.08 | 6.67  | 1.07 | -3.22 | -0.22 | -0.37 | -0.08 | .005   |
|                        | svPPA   | 6.53  | 0.92 | 6.10  | 0.87 | -6.57 | -0.43 | -0.61 | -0.25 | .001*  |
|                        | lvPPA   | 7.26  | 0.83 | 7.11  | 0.89 | -2.03 | -0.15 | -0.30 | 0.01  | .062   |
|                        | HC      | 8.01  | 0.74 | 7.94  | 0.75 | -0.87 | -0.07 | -0.15 | 0.00  | .054   |
| <b>Insula R</b>        | PPA all | 6.97  | 1.14 | 6.79  | 1.11 | -2.68 | -0.19 | -0.26 | -0.11 | <.001* |
|                        | nfvPPA  | 7.10  | 1.04 | 6.97  | 0.98 | -1.80 | -0.13 | -0.25 | -0.01 | .041   |
|                        | svPPA   | 6.44  | 1.68 | 6.06  | 1.56 | -5.91 | -0.38 | -0.51 | -0.25 | <.001* |
|                        | lvPPA   | 7.13  | 0.81 | 6.97  | 0.82 | -2.15 | -0.15 | -0.25 | -0.05 | .008   |
|                        | HC      | 7.84  | 0.69 | 7.70  | 0.76 | -1.79 | -0.14 | -0.26 | -0.02 | .031   |
| <b>Putamen L</b>       | PPA all | 2.55  | 0.45 | 2.37  | 0.55 | -7.03 | -0.18 | -0.25 | -0.11 | <.001* |
|                        | nfvPPA  | 2.47  | 0.49 | 2.27  | 0.63 | -7.82 | -0.19 | -0.31 | -0.08 | .002   |
|                        | svPPA   | 2.61  | 0.34 | 2.42  | 0.27 | -7.33 | -0.19 | -0.36 | -0.02 | .033   |
|                        | lvPPA   | 2.66  | 0.53 | 2.48  | 0.62 | -6.87 | -0.15 | -0.30 | 0.02  | .058   |
|                        | HC      | 3.18  | 0.51 | 3.15  | 0.51 | -0.94 | -0.04 | -0.17 | 0.10  | .572   |
| <b>Putamen R</b>       | PPA all | 2.72  | 0.49 | 2.60  | 0.53 | -4.42 | -0.12 | -0.18 | -0.06 | <.001* |
|                        | nfvPPA  | 2.79  | 0.50 | 2.71  | 0.51 | -2.80 | -0.08 | -0.17 | 0.01  | .079   |
|                        | svPPA   | 2.53  | 0.57 | 2.32  | 0.59 | -8.17 | -0.21 | -0.36 | -0.05 | .017   |
|                        | lvPPA   | 2.73  | 0.43 | 2.60  | 0.48 | -4.78 | -0.13 | -0.25 | -0.01 | .042   |
|                        | HC      | 3.36  | 0.53 | 3.26  | 0.53 | -2.98 | -0.10 | -0.23 | 0.03  | .120   |
| <b>Angular gyrus L</b> | PPA all | 8.80  | 1.31 | 8.49  | 1.42 | -3.56 | -0.31 | -0.46 | -0.17 | <.001* |
|                        | nfvPPA  | 8.87  | 1.37 | 8.47  | 1.64 | -4.47 | -0.40 | -0.66 | -0.14 | .005   |
|                        | svPPA   | 8.96  | 1.63 | 8.78  | 1.53 | -2.01 | -0.18 | -0.61 | 0.25  | .343   |
|                        | lvPPA   | 8.58  | 1.06 | 8.31  | 1.01 | -3.10 | -0.27 | -0.36 | -0.17 | <.001* |
|                        | HC      | 10.26 | 1.38 | 10.32 | 1.34 | 0.58  | 0.05  | -0.12 | 0.23  | .506   |

|                              |         |       |      |       |      |       |       |       |       |        |
|------------------------------|---------|-------|------|-------|------|-------|-------|-------|-------|--------|
| <b>Angular gyrus R</b>       | PPA all | 9.74  | 1.90 | 9.57  | 1.90 | -1.72 | -0.17 | -0.28 | -0.05 | .007   |
|                              | nfvPPA  | 10.15 | 1.76 | 10.00 | 1.79 | -1.47 | -0.15 | -0.37 | 0.07  | .173   |
|                              | svPPA   | 9.12  | 2.59 | 8.91  | 2.51 | -2.28 | -0.21 | -0.47 | 0.06  | .103   |
|                              | lvPPA   | 9.46  | 1.61 | 9.29  | 1.58 | -1.77 | -0.17 | -0.29 | -0.05 | .012   |
|                              | HC      | 10.66 | 1.11 | 10.53 | 1.18 | -1.22 | -0.13 | -0.33 | 0.07  | .186   |
| <b>Supramarginal gyrus L</b> | PPA all | 7.30  | 1.46 | 7.06  | 1.48 | -3.24 | -0.24 | -0.36 | -0.11 | <.001* |
|                              | nfvPPA  | 7.24  | 1.36 | 6.97  | 1.40 | -3.73 | -0.27 | -0.46 | -0.08 | .008   |
|                              | svPPA   | 7.80  | 1.77 | 7.46  | 1.86 | -4.41 | -0.34 | -0.70 | 0.01  | .054   |
|                              | lvPPA   | 7.04  | 1.47 | 6.94  | 1.46 | -1.46 | -0.10 | -0.31 | 0.10  | .276   |
|                              | HC      | 8.26  | 1.14 | 8.27  | 1.14 | 0.12  | 0.02  | -0.11 | 0.14  | .749   |
| <b>Supramarginal gyrus R</b> | PPA all | 6.65  | 1.23 | 6.56  | 1.19 | -1.37 | -0.09 | -0.19 | 0.01  | .064   |
|                              | nfvPPA  | 6.76  | 1.14 | 6.68  | 1.06 | -1.18 | -0.08 | -0.23 | 0.07  | .261   |
|                              | svPPA   | 6.28  | 1.48 | 6.16  | 1.50 | -1.88 | -0.12 | -0.45 | 0.21  | .412   |
|                              | lvPPA   | 6.74  | 1.28 | 6.65  | 1.22 | -1.38 | -0.09 | -0.26 | 0.08  | .249   |
|                              | HC      | 7.63  | 1.01 | 7.60  | 0.96 | -0.39 | -0.03 | -0.19 | 0.14  | .720   |
| <b>Precentral gyrus L</b>    | PPA all | 10.34 | 1.88 | 10.17 | 1.98 | -1.60 | -0.17 | -0.42 | 0.09  | .195   |
|                              | nfvPPA  | 9.74  | 1.92 | 9.32  | 1.88 | -4.38 | -0.43 | -0.72 | -0.13 | .007   |
|                              | svPPA   | 11.33 | 1.89 | 11.30 | 2.06 | -0.25 | -0.03 | -0.45 | 0.40  | .878   |
|                              | lvPPA   | 10.20 | 1.37 | 9.98  | 1.56 | -2.16 | -0.22 | -0.55 | 0.10  | .150   |
|                              | HC      | 11.48 | 1.32 | 11.67 | 1.37 | 1.66  | 0.19  | -0.16 | 0.54  | .253   |
| <b>Precentral gyrus R</b>    | PPA all | 10.10 | 1.63 | 9.92  | 1.61 | -1.75 | -0.18 | -0.42 | 0.06  | .143   |
|                              | nfvPPA  | 9.55  | 1.65 | 9.20  | 1.45 | -3.66 | -0.35 | -0.63 | -0.07 | .018   |
|                              | svPPA   | 11.02 | 1.48 | 10.85 | 1.59 | -1.57 | -0.17 | -0.97 | 0.63  | .617   |
|                              | lvPPA   | 10.11 | 1.50 | 9.95  | 1.53 | -1.58 | -0.16 | -0.46 | 0.13  | .232   |
|                              | HC      | 10.61 | 1.14 | 10.72 | 1.16 | 1.04  | 0.11  | -0.37 | 0.59  | .625   |
