# Supplementary material for: A language-based sum score for the course and therapeutic intervention in primary progressive aphasia
Source: Springer Nature journal article supplement (doi:10.1186/s13195-018-0345-3), 2018-04-25
Supplement: MOESM4 [file 15718400]

Additional file 4: Table S4. Sample size calculation based on the observed mean decline (Mean Decl.) in the FTLD-CDR score within one year. Percent values indicate a reduction of cognitive decline, the required number of cases per group (N p Group) correspond to verum and placebo. The power was set to 80%, the alpha error level to 5% for the use of a unpaired t-Test. nfvPPA (N=15), svPPA (N=11), lvPPA (N=9)

|             | <b>FTLD-CDR</b> |           |               |           |              |           |              |           |
|-------------|-----------------|-----------|---------------|-----------|--------------|-----------|--------------|-----------|
|             | <b>PPA all</b>  |           | <b>nfvPPA</b> |           | <b>svPPA</b> |           | <b>lvPPA</b> |           |
|             | Mean Decl.      | N p Group | Mean Decl.    | N p Group | Mean Decl.   | N p Group | Mean Decl.   | N p Group |
| <b>10%</b>  | 0.23            | 2310      | 0.19          | 1436      | 0.31         | 1879      | 0.21         | 4496      |
| <b>20%</b>  | 0.47            | 578       | 0.39          | 359       | 0.62         | 470       | 0.42         | 1124      |
| <b>30%</b>  | 0.70            | 257       | 0.58          | 160       | 0.93         | 209       | 0.63         | 500       |
| <b>40%</b>  | 0.94            | 145       | 0.77          | 90        | 1.24         | 118       | 0.84         | 281       |
| <b>50%</b>  | 1.17            | 93        | 0.97          | 58        | 1.55         | 76        | 1.06         | 180       |
| <b>60%</b>  | 1.40            | 65        | 1.16          | 40        | 1.85         | 53        | 1.27         | 125       |
| <b>70%</b>  | 1.64            | 48        | 1.35          | 30        | 2.16         | 39        | 1.48         | 92        |
| <b>80%</b>  | 1.87            | 37        | 1.54          | 23        | 2.47         | 30        | 1.69         | 71        |
| <b>90%</b>  | 2.11            | 29        | 1.74          | 18        | 2.78         | 24        | 1.90         | 56        |
| <b>100%</b> | 2.34            | 24        | 1.93          | 15        | 3.09         | 19        | 2.11         | 45        |
